# Supplementary material
Source: PubMed Central journal article supplement (PMC5714456)
Supplement: 1401TableS1.pdf [file 1401TableS1.pdf]

**Table S1: Genotypes of the flies used in this study**

| Figure panels | Genotypes tested                                                                                                                           |
|---------------|--------------------------------------------------------------------------------------------------------------------------------------------|
| 2A            | <i>GAL4<sup>477</sup>,UAS-mCD8::GFP/+; GAL4<sup>ppk1.9</sup>,UASmCD8::GFP/+</i>                                                            |
| 2A            | <i>2R WT MARCM control</i>                                                                                                                 |
| 2A            | <i>GAL4<sup>477</sup>,UAS-mCD8::GFP/+; GAL4<sup>ppk1.9</sup>,UASmCD8::GFP/UAS-RpL7-IR</i>                                                  |
| 2A            | <i>GAL4<sup>477</sup>,UAS-mCD8::GFP/+;GAL4<sup>ppk1.9</sup>,UASmCD8::GFP/UAS-RpL36A-IR</i>                                                 |
| 2A            | <i>GAL4<sup>477</sup>,UAS-mCD8::GFP/+; GAL4<sup>ppk1.9</sup>,UASmCD8::GFP/UAS-dmn-IR</i>                                                   |
| 2A            | <i>GAL4<sup>5-40</sup>, UAS-Venus.m<sup>1</sup>, SOP-FLP<sup>42</sup>; FRT<sup>42D</sup>, dmn<sup>k16109</sup>;+ (dmn MARCM)</i>           |
| 2A            | <i>GAL4<sup>477</sup>,UAS-mCD8::GFP/+; GAL4<sup>ppk1.9</sup>,UASmCD8::GFP/UAS-msps-IR</i>                                                  |
| 2A            | <i>ppkEGFP/+;+;msps<sup>M109877</sup>/+</i>                                                                                                |
| 2A            | <i>GAL4<sup>477</sup>,UAS-mCD8::GFP/+; GAL4<sup>ppk1.9</sup>,UASmCD8::GFP/UAS-T-cp1-IR</i>                                                 |
| 2A            | <i>ppkEGFP/+;+; T-cp1<sup>c03987</sup>/+</i>                                                                                               |
| 2A            | <i>GAL4<sup>477</sup>,UAS-mCD8::GFP/+;GAL4<sup>ppk1.9</sup>,UASmCD8::GFP/UAS-CCT2-IR</i>                                                   |
| 3A            | <i>GAL4<sup>477</sup>,UAS-mCD8::GFP/+; GAL4<sup>ppk1.9</sup>,UASmCD8::GFP/+</i>                                                            |
| 3A            | <i>GAL4<sup>477</sup>,UAS-mCD8::GFP/+; GAL4<sup>ppk1.9</sup>,UASmCD8::GFP/UAS-wdb-IR</i>                                                   |
| 3A            | <i>GAL4<sup>5-40</sup>, UAS-Venus.m<sup>1</sup>, SOP-FLP<sup>42</sup>;+; FRT<sup>82B</sup> wdb<sup>14</sup> (wdb MARCM)</i>                |
| 3A            | <i>GAL4<sup>477</sup>,UAS-mCD8::GFP/+; GAL4<sup>ppk1.9</sup>,UASmCD8::GFP/UAS-Ank2-IR</i>                                                  |
| 3A            | <i>ppkEGFP/+;+; Ank2<sup>M106602</sup>/+</i>                                                                                               |
| 3A            | <i>GAL4<sup>477</sup>,UAS-mCD8::GFP/+;GAL4<sup>ppk1.9</sup>,UASmCD8::GFP/UAS-RhoGAP18B-IR</i>                                              |
| 3A            | <i>RhoGAP18B<sup>KG00160</sup>/+;+; ppkEGFP/+</i>                                                                                          |
| 3A            | <i>GAL4<sup>477</sup>,UAS-mCD8::GFP/+;GAL4<sup>ppk1.9</sup>,UASmCD8::GFP/UAS-ctp/Cdlec2-IR</i>                                             |
| 3A            | <i>ctp<sup>G0445b</sup>, FRT<sup>19A</sup>; PGawB<sup>109(2)80</sup>,UAS-mCD8::GFP.L<sup>LL5</sup>, SOP-FLP<sup>73</sup>;+ (ctp MARCM)</i> |
| 4A            | <i>GAL4<sup>477</sup>,UAS-mCD8::GFP/+;GAL4<sup>ppk1.9</sup>,UASmCD8::GFP/+</i>                                                             |
| 4A            | <i>19A MARCM control</i>                                                                                                                   |
| 4A            | <i>GAL4<sup>477</sup>,UAS-mCD8::GFP/+; GAL4<sup>ppk1.9</sup>,UASmCD8::GFP/UAS-SkpA-IR</i>                                                  |
| 4A            | <i>SkpA<sup>A</sup>, FRT<sup>19A</sup>; PGawB<sup>109(2)80</sup>,UAS-mCD8::GFP.L<sup>LL5</sup>, SOP-FLP<sup>73</sup>;+ (SkpA MARCM)</i>    |
| 4A            | <i>GAL4<sup>477</sup>,UAS-mCD8::GFP/+; GAL4<sup>ppk1.9</sup>,UASmCD8::GFP/UAS-cpa-IR</i>                                                   |

|    |                                                                                                                      |
|----|----------------------------------------------------------------------------------------------------------------------|
| 4A | <i>+</i> ; <i>cpa</i> <sup>KG02261</sup> / <i>+</i> ; <i>ppk::tdtomato</i>                                           |
| 4A | <i>GAL4</i> <sup>477</sup> , <i>UAS-mCD8::GFP/+</i> ; <i>GAL4</i> <sup>ppk1.9</sup> , <i>UASmCD8::GFP/UAS-cpb-IR</i> |
| 4A | <i>+</i> ; <i>cpb</i> <sup>F19</sup> / <i>+</i> ; <i>ppk::tdtomato</i>                                               |
| 5A | <i>+</i> ; <i>GAL4</i> <sup>221</sup> , <i>UAS-mCD8::GFP/+</i>                                                       |
| 5B | <i>UAS-cut/+</i> ; <i>GAL4</i> <sup>221</sup> , <i>UAS-mCD8::GFP/+</i>                                               |
| 5C | <i>UAS-cut/+</i> ; <i>GAL4</i> <sup>221</sup> , <i>UAS-mCD8::GFP/RhoGAP18B-IR</i>                                    |
| 5D | <i>UAS-cut/+</i> ; <i>GAL4</i> <sup>221</sup> , <i>UAS-mCD8::GFP/RpL36A-IR</i>                                       |
| 5E | <i>UAS-cut/+</i> ; <i>GAL4</i> <sup>221</sup> , <i>UAS-mCD8::GFP/wdb-IR</i>                                          |
| 5F | <i>UAS-cut/+</i> ; <i>GAL4</i> <sup>221</sup> , <i>UAS-mCD8::GFP/ctp/Cd1c2-IR</i>                                    |
| 5G | <i>UAS-cut/+</i> ; <i>GAL4</i> <sup>221</sup> , <i>UAS-mCD8::GFP/msps-IR</i>                                         |
| 5H | <i>UAS-cut/+</i> ; <i>GAL4</i> <sup>221</sup> , <i>UAS-mCD8::GFP/cpa-IR</i>                                          |
| 5I | <i>UAS-cut/+</i> ; <i>GAL4</i> <sup>221</sup> , <i>UAS-mCD8::GFP/cpb-IR</i>                                          |
| 5J | <i>UAS-cut/+</i> ; <i>GAL4</i> <sup>221</sup> , <i>UAS-mCD8::GFP/Skpa-IR</i>                                         |
| 5K | <i>UAS-kn/+</i> ; <i>GAL4</i> <sup>221</sup> , <i>UAS-mCD8::GFP/+</i>                                                |
| 5L | <i>UAS-kn/+</i> ; <i>GAL4</i> <sup>221</sup> , <i>UAS-mCD8::GFP/wdb-IR</i>                                           |
| 5M | <i>UAS-kn/+</i> ; <i>GAL4</i> <sup>221</sup> , <i>UAS-mCD8::GFP/Ank2-IR</i>                                          |
| 5N | <i>UAS-kn/+</i> ; <i>GAL4</i> <sup>221</sup> , <i>UAS-mCD8::GFP/RhoGAP18B-IR</i>                                     |
| 5O | <i>UAS-kn/+</i> ; <i>GAL4</i> <sup>221</sup> , <i>UAS-mCD8::GFP/RpL7-IR</i>                                          |
| 5P | <i>UAS-kn/+</i> ; <i>GAL4</i> <sup>221</sup> , <i>UAS-mCD8::GFP/RpL36A-IR</i>                                        |
| 5Q | <i>UAS-kn/+</i> ; <i>GAL4</i> <sup>221</sup> , <i>UAS-mCD8::GFP/T-cpl-IR</i>                                         |
| 6A | <i>UAS-GMA::GFP/+</i> ; <i>GAL4</i> <sup>477</sup> , <i>UAS-mCherry::Jup/+</i> ; <i>+</i>                            |
| 6B | <i>UAS-GMA::GFP/+</i> ; <i>GAL4</i> <sup>477</sup> , <i>UAS-mCherry::Jup</i> ; <i>UAS-Rpl7-IR /+</i>                 |
| 6C | <i>UAS-GMA::GFP/+</i> ; <i>GAL4</i> <sup>477</sup> , <i>UAS-mCherry::Jup</i> ; <i>UAS-Rpl36A-IR /+</i>               |
| 6D | <i>UAS-GMA::GFP/+</i> ; <i>GAL4</i> <sup>477</sup> , <i>UAS-mCherry::Jup</i> ; <i>UAS-dmn-IR /+</i>                  |
| 6E | <i>UAS-GMA::GFP/+</i> ; <i>GAL4</i> <sup>477</sup> , <i>UAS-mCherry::Jup</i> ; <i>UAS-msps-IR /+</i>                 |
| 6F | <i>UAS-GMA::GFP/+</i> ; <i>GAL4</i> <sup>477</sup> , <i>UAS-mCherry::Jup</i> ; <i>UAS-CCT2-IR /+</i>                 |
| 7A | <i>UAS-GMA::GFP/+</i> ; <i>GAL4</i> <sup>477</sup> , <i>UAS-mCherry::Jup/+</i> ; <i>+</i>                            |
| 7B | <i>UAS-GMA::GFP/+</i> ; <i>GAL4</i> <sup>477</sup> , <i>UAS-mCherry::Jup</i> ; <i>UAS-wdb-IR /+</i>                  |

|       |                                                                                            |
|-------|--------------------------------------------------------------------------------------------|
| 7C    | <i>UAS-GMA::GFP/+; GAL4<sup>477</sup>, UAS-mCherry::Jup; UAS-Ank2-IR /+</i>                |
| 7D    | <i>UAS-GMA::GFP/+; GAL4<sup>477</sup>, UAS-mCherry::Jup; UAS-RhoGAP18B-IR /+</i>           |
| 7E    | <i>UAS-GMA::GFP/+; GAL4<sup>477</sup>, UAS-mCherry::Jup; UAS-ctp/Cdlc2-IR /+</i>           |
| 8A    | <i>UAS-GMA::GFP/+; GAL4<sup>477</sup>, UAS-mCherry::Jup/+; +</i>                           |
| 8B    | <i>UAS-GMA::GFP/+; GAL4<sup>477</sup>, UAS-mCherry::Jup; UAS-SkpA-IR /+</i>                |
| 8C    | <i>UAS-GMA::GFP/+; GAL4<sup>477</sup>, UAS-mCherry::Jup; UAS-cpa-IR /+</i>                 |
| 8D    | <i>UAS-GMA::GFP/+; GAL4<sup>477</sup>, UAS-mCherry::Jup; UAS-cpb-IR /+</i>                 |
| S4D   | <i>GAL4<sup>477</sup>, UAS-mCD8::GFP/+; GAL4<sup>ppk1.9</sup>, UASmCD8::GFP/+</i>          |
| S4E   | <i>GAL4<sup>477</sup>, UAS-mCD8::GFP/UAS-ctp; GAL4<sup>ppk1.9</sup>, UASmCD8::GFP/+</i>    |
| S4F   | <i>GAL4<sup>477</sup>, UAS-mCD8::GFP/+; GAL4<sup>ppk1.9</sup>, UASmCD8::GFP/UAS-wdb</i>    |
| S4G,H | <i>GAL4<sup>477</sup>, UAS-mCD8::GFP/+; GAL4<sup>ppk1.9</sup>, UASmCD8::GFP/UAS-RpL7</i>   |
| S4G,H | <i>GAL4<sup>477</sup>, UAS-mCD8::GFP/+; GAL4<sup>ppk1.9</sup>, UASmCD8::GFP/UAS-RpL36A</i> |
| S4G,H | <i>GAL4<sup>477</sup>, UAS-mCD8::GFP/UAS-dmn; GAL4<sup>ppk1.9</sup>, UASmCD8::GFP/+</i>    |
| S4G,H | <i>GAL4<sup>477</sup>, UAS-mCD8::GFP/UAS-CCT2; GAL4<sup>ppk1.9</sup>, UASmCD8::GFP/+</i>   |
| S4G,H | <i>GAL4<sup>477</sup>, UAS-mCD8::GFP/+; GAL4<sup>ppk1.9</sup>, UASmCD8::GFP/UAS-SkpA</i>   |
| S4G,H | <i>GAL4<sup>477</sup>, UAS-mCD8::GFP/ UAS-cpb; GAL4<sup>ppk1.9</sup>, UASmCD8::GFP/+</i>   |
| S5A   | <i>GAL4<sup>477</sup> / +; ppk::tdTomato/+</i>                                             |
| S5B   | <i>GAL4<sup>477</sup> / +; ppk::tdTomato /UAS-RpL7-IR</i>                                  |
| S5C   | <i>GAL4<sup>477</sup> / +; ppk::tdTomato /UAS-RpL36A-IR</i>                                |
| S5D   | <i>GAL4<sup>477</sup> / +; ppk::tdTomato /UAS-dmn-IR</i>                                   |
| S5E   | <i>GAL4<sup>477</sup> / +; ppk::tdTomato /UAS-msps-IR</i>                                  |
| S5F   | <i>GAL4<sup>477</sup> / +; ppk::tdTomato /UAS-T-cp1-IR</i>                                 |
| S5G   | <i>GAL4<sup>477</sup> / +; ppk::tdTomato /UAS-CCT2-IR</i>                                  |
| S5H   | <i>GAL4<sup>477</sup> / +; ppk::tdTomato /UAS-wdb-IR</i>                                   |
| S5I   | <i>GAL4<sup>477</sup> / +; ppk::tdTomato /UAS-Ank2-IR</i>                                  |
| S5J   | <i>GAL4<sup>477</sup> / +; ppk::tdTomato /UAS-RhoGAP18B-IR</i>                             |
| S5K   | <i>GAL4<sup>477</sup> / +; ppk::tdTomato /UAS-ctp/Cdlc2-IR</i>                             |
| S5L   | <i>GAL4<sup>477</sup> / +; ppk::tdTomato /UAS-SkpA-IR</i>                                  |

|                             |                                                                               |
|-----------------------------|-------------------------------------------------------------------------------|
| <i>S5M</i>                  | <i>GAL4<sup>477</sup>/+; ppk::tdTomato /UAS-cpa-IR</i>                        |
| <i>S5N</i>                  | <i>GAL4<sup>477</sup>/+; ppk::tdTomato /UAS-cpb-IR</i>                        |
| <i>S8 (CIV WT)</i>          | <i>UAS-GMA::GFP/+; GAL4<sup>477</sup>, UAS-mCherry::Jup/+; +</i>              |
| <i>S8 (CIV&gt;RpL36-IR)</i> | <i>UAS-GMA::GFP/+; GAL4<sup>477</sup>, UAS-mCherry::Jup; UAS-RpL36A-IR /+</i> |
