# Supplementary material
Source: PubMed Central journal article supplement (PMC5714456)
Supplement: 1401TableS2.pdf [file 1401TableS2.pdf]

**Table S2: List of all the genetic strains used in this study**

| NO. | GENE SYMBOL           | CUT AND/OR KNOT | STOCK #        |
|-----|-----------------------|-----------------|----------------|
| 1.  | <i>Ggamma1-IR</i>     | K               | 25934          |
| 2.  | <i>Ggamma1-IR</i>     | K               | <b>34372</b>   |
| 3.  | <i>G-ialpha65A-IR</i> | C, K            | 34924          |
| 4.  | <i>G-ialpha65A-IR</i> | C, K            | <b>35407</b>   |
| 5.  | <i>G-ialpha65A-IR</i> | C, K            | 40890          |
| 6.  | <i>TpnC47D-IR</i>     | C               | 26172          |
| 7.  | <i>TpnC47D-IR</i>     | C               | <b>v103240</b> |
| 8.  | <i>Lasp-IR</i>        | C, K            | <b>26305</b>   |
| 9.  | <i>Lasp-IR</i>        | C, K            | v109416        |
| 10. | <i>lark-IR</i>        | C               | <b>27703</b>   |
| 11. | <i>lark-IR</i>        | C               | v108993        |
| 12. | <i>jar-IR</i>         | C               | <b>28064</b>   |
| 13. | <i>jar-IR</i>         | C               | v108221        |
| 14. | <i>dmn-IR</i>         | C               | 28596          |
| 15. | <i>dmn-IR</i>         | C               | <b>v110741</b> |
| 16. | <i>Pax-IR</i>         | C               | <b>28695</b>   |
| 17. | <i>Pax-IR</i>         | C               | 42614          |
| 18. | <i>wdb-IR</i>         | C, K            | 28939          |
| 19. | <i>wdb-IR</i>         | C, K            | v101406        |
| 20. | <i>wdb-IR</i>         | C, K            | 38950          |
| 21. | <i>wdb-IR</i>         | C, K            | <b>38901</b>   |
| 22. | <i>Ank2-IR</i>        | K               | 29438          |
| 23. | <i>Ank2-IR</i>        | K               | <b>33414</b>   |
| 24. | <i>msps-IR</i>        | C               | 31138          |
| 25. | <i>msps-IR</i>        | C               | <b>38990</b>   |
| 26. | <i>RhoGAP18B-IR</i>   | C, K            | <b>31165</b>   |
| 27. | <i>RhoGAP18B-IR</i>   | C, K            | 56856          |
| 28. | <i>pod1-IR</i>        | C               | 31219          |
| 29. | <i>pod1-IR</i>        | C               | <b>41705</b>   |
| 30. | <i>Arpc1-IR</i>       | K               | 31246          |
| 31. | <i>Arpc1-IR</i>       | K               | <b>v100573</b> |
| 32. | <i>sls-IR</i>         | C, K            | <b>31538</b>   |
| 33. | <i>sls-IR</i>         | C, K            | 31539          |
| 34. | <i>ctp/Cdlc2-IR</i>   | C               | <b>42862</b>   |
| 35. | <i>ctp-IR</i>         | C               | <b>44044</b>   |
| 36. | <i>CG1890-IR</i>      | K               | 31573          |
| 37. | <i>CG1890-IR</i>      | K               | <b>53677</b>   |

|     |                      |      |                |
|-----|----------------------|------|----------------|
| 38. | <i>Ubc6-IR</i>       | C, K | <b>42631</b>   |
| 39. | <i>Arpc2-IR</i>      | C    | 43132          |
| 40. | <i>Arpc2-IR</i>      | C    | 28011          |
| 41. | <i>Arpc2-IR</i>      | C    | <b>v104396</b> |
| 42. | <i>aurA-IR</i>       | K    | 31704          |
| 43. | <i>aurA-IR</i>       | K    | <b>41889</b>   |
| 44. | <i>aurB-IR</i>       | K    | <b>28691</b>   |
| 45. | <i>aurB-IR</i>       | K    | 35299          |
| 46. | <i>Moe-IR</i>        | C    | 31872          |
| 47. | <i>Moe-IR</i>        | C    | <b>33936</b>   |
| 48. | <i>Myo28B1-IR</i>    | K    | 41717          |
| 49. | <i>Myo28B1-IR</i>    | K    | <b>v101016</b> |
| 50. | <i>Hip1-IR</i>       | K    | <b>32504</b>   |
| 51. | <i>Hip1-IR</i>       | K    | 38377          |
| 52. | <i>SkpA-IR</i>       | C    | 32870          |
| 53. | <i>SkpA-IR</i>       | C    | <b>32991</b>   |
| 54. | <i>SkpA-IR</i>       | C    | 28974          |
| 55. | <i>ck-IR</i>         | C, K | <b>41690</b>   |
| 56. | <i>ck-IR</i>         | C, K | v100010        |
| 57. | <i>RpL7-IR</i>       | K    | <b>34600</b>   |
| 58. | <i>Kif19A-IR</i>     | K    | <b>35472</b>   |
| 59. | <i>Kif19A-IR</i>     | K    | v106569        |
| 60. | <i>PIP4K-IR</i>      | K    | 35338          |
| 61. | <i>PIP4K-IR</i>      | K    | <b>35660</b>   |
| 62. | <i>RpL36A-IR</i>     | C, K | <b>43252</b>   |
| 63. | <i>pav-IR</i>        | K    | <b>35649</b>   |
| 64. | <i>pav-IR</i>        | K    | 43963          |
| 65. | <i>ssp2-IR</i>       | K    | 41837          |
| 66. | <i>ssp2-IR</i>       | K    | <b>v105723</b> |
| 67. | <i>Mapmodulin-IR</i> | C    | 43988          |
| 68. | <i>Mapmodulin-IR</i> | C    | <b>v100283</b> |
| 69. | <i>nuf-IR</i>        | C    | 43999          |
| 70. | <i>nuf-IR</i>        | C    | <b>44035</b>   |
| 71. | <i>Pomp-IR</i>       | C    | <b>51399</b>   |
| 72. | <i>Pomp-IR</i>       | C    | v100628        |
| 73. | <i>GMF-IR</i>        | C    | <b>51452</b>   |
| 74. | <i>GMF-IR</i>        | C    | v101994        |
| 75. | <i>BBS4-IR</i>       | K    | 53305          |
| 76. | <i>BBS4-IR</i>       | K    | <b>v100571</b> |
| 77. | <i>cpa-IR</i>        | C,   | <b>41685</b>   |
| 78. | <i>cpa-IR</i>        | C,   | 31124          |

|      |                  |      |                |
|------|------------------|------|----------------|
| 79.  | <i>cpa-IR</i>    | C,   | 41685          |
| 80.  | <i>cpb-IR</i>    | C    | 26298          |
| 81.  | <i>cpb-IR</i>    | C    | 41952          |
| 82.  | <i>cpb-IR</i>    | C    | <b>50954</b>   |
| 83.  | <i>cib-IR</i>    | C, K | 28003          |
| 84.  | <i>cib-IR</i>    | C, K | <b>36630</b>   |
| 85.  | <i>klar-IR</i>   | C, K | <b>28313</b>   |
| 86.  | <i>klar-IR</i>   | C, K | 36721          |
| 87.  | <i>Msp300-IR</i> | K    | <b>32377</b>   |
| 88.  | <i>Msp300-IR</i> | K    | 32848          |
| 89.  | <i>Frl-IR</i>    | K    | <b>32447</b>   |
| 90.  | <i>Frl-IR</i>    | K    | v110438        |
| 91.  | <i>T-cp1-IR</i>  | K    | v34070         |
| 92.  | <i>T- cp1-IR</i> | K    | <b>32854</b>   |
| 93.  | <i>CCT2-IR</i>   | C    | <b>34711</b>   |
| 94.  | <i>CCT2-IR</i>   | C    | 53754          |
| 95.  | <i>CCT2-IR</i>   | C    | 53755          |
| 96.  | <i>CCT2-IR</i>   | C    | v108615        |
| 97.  | <i>chic-IR</i>   | C    | 34523          |
| 98.  | <i>chic-IR</i>   | C    | <b>v102759</b> |
| 99.  | <i>hts-IR</i>    | C    | <b>35421</b>   |
| 100. | <i>hts-IR</i>    | C    | 38283          |
| 101. | <i>DAAM-IR</i>   | K    | <b>39058</b>   |
| 102. | <i>DAAM-IR</i>   | K    | v103921        |
| 103. | <i>didum-IR</i>  | K    | <b>55740</b>   |

**Mutants**

|      |                                |  |                   |
|------|--------------------------------|--|-------------------|
| 104. | <i>dmn</i> <sup>k16109</sup>   |  | <b>111353 (D)</b> |
| 105. | <i>msps</i> <sup>MI09877</sup> |  | <b>53789</b>      |
| 106. | <i>msps</i> <sup>MI14162</sup> |  | 59478             |
| 107. | <i>T-cp1</i> <sup>c03987</sup> |  | <b>11325</b>      |
| 108. | <i>wdb</i> <sup>14</sup>       |  | <b>53712</b>      |
| 109. | <i>Ank2</i> <sup>MI06602</sup> |  | <b>60798</b>      |
| 110. | <i>Ank2</i> <sup>f02001</sup>  |  | 18502             |

|                                            |                                       |            |
|--------------------------------------------|---------------------------------------|------------|
| 111.                                       | <i>RhoGAP18B</i> <sup>KG00160</sup>   | 13054      |
| 112.                                       | <i>RhoGAP18B</i> <sup>MI01863</sup>   | 34454      |
| 113.                                       | <i>RhoGAP18B</i> <sup>MI13653</sup>   | 59657      |
| 114.                                       | <i>RhoGAP18B</i> <sup>5-HA-2717</sup> | 125628     |
| 115.                                       | <u><i>ctp</i></u> <sup>G0445b</sup>   | 111849 (D) |
| 116.                                       | <u><i>ctp</i></u> <sup>G0153</sup>    | 111805 (D) |
| 117.                                       | <u><i>ctp</i></u> <sup>G0371</sup>    | 111880 (D) |
| 118.                                       | <u><i>SkpA</i></u> <sup>A1</sup>      | 57130      |
| 119.                                       | <i>SkpA</i> <sup>G0037</sup>          | 111767 (D) |
| 120.                                       | <i>SkpA</i> <sup>G0058</sup>          | 111776 (D) |
| 121.                                       | <i>cpa</i> <sup>KG02261</sup>         | 13197      |
| 122.                                       | <i>cpb</i> <sup>F19</sup>             | 8808       |
| 123.                                       | <i>cpb</i> <sup>6.15</sup>            | 8742       |
| <b><i>Overexpression of transgenes</i></b> |                                       |            |
| 124.                                       | <i>UAS-RpL7</i>                       | F001331    |
| 125.                                       | <i>UAS-RpL36A</i>                     | F000861    |
| 126.                                       | <i>UAS-dmn</i>                        | 8784       |
| 127.                                       | <i>UAS-CCT2</i>                       | 53754      |
| 128.                                       | <i>UAS-wdb</i>                        | 55052      |
| 129.                                       | <i>UAS-ctp</i>                        | 56767      |
| 130.                                       | <i>UAS-SkpA</i>                       | F001570    |

|             |                |               |
|-------------|----------------|---------------|
| <b>131.</b> | <i>UAS-cpb</i> | <b>B21791</b> |
| <b>132.</b> | <i>UAS-cpb</i> | 58727         |
| <b>133.</b> | <i>UAS-cpb</i> | 58728         |

The gene symbol is based on the FlyBase nomenclature. The Cut or Knot column indicates if the gene came from the Cut and/or Knot-regulated list. Stock number refers to either Bloomington Drosophila Stock Center or if it starts with 'v', it refers to Vienna Drosophila Research Center number or ; 'F', FlyORF ; DGRC/DGGR, Kyoto Stock Center (D). Stock numbers of the genes for which representative data are presented in this paper have been highlighted in **bold**.
