# Supplementary material
Source: PubMed Central journal article supplement (PMC5714456)
Supplement: 1401TableS3.pdf [file 1401TableS3.pdf]

Table S3: Human orthologs and biomedical relevance of characterized *Drosophila* genes.

| <b>Genes</b>                 | <b>Biological process</b>                    | <b>Ct and/or Kn</b> | <b>Human ortholog;<br/>Biomedical relevance</b>                                                                                                                  | <b>References</b>                                                                                  |
|------------------------------|----------------------------------------------|---------------------|------------------------------------------------------------------------------------------------------------------------------------------------------------------|----------------------------------------------------------------------------------------------------|
| <i>RpL7</i><br><i>RpL36A</i> | ribosomal regulatory function                | Ct/Kn               | <i>RpL7</i><br><i>RpL36A</i><br><br>Autism;<br>ribosomopathies                                                                                                   | Klauck et al. 2006;<br>Narla & Ebert, 2010;<br>Armistead & Triggs-Raine, 2014;<br>Zhou et al. 2015 |
| <i>dmn</i>                   | neurogenesis,<br>microtubule-based transport | Ct                  | <i>DCTN2</i> ;<br><br>exacerbate tauopathies<br>(e.g. Alzheimer disease)                                                                                         | Butzlaff et al. 2015                                                                               |
| <i>T-cpl</i><br><i>CCT2</i>  | chaperonin activity                          | Kn                  | <i>TCPI</i><br><i>CCT2</i><br><br>Huntington disease;<br>Gaucher disease;<br>hypoparathyroidism-retardation-Dysmorphism (HRD) syndrome;<br>Kenny-affey syndromes | Tam et al 2006;<br>Parvari et al. 2002                                                             |
| <i>wdb</i>                   | cytoskeletal regulation,<br>autophagy        | Ct/Kn               | <i>PPP2R5D</i> ;<br><br>autosomal dominant mental retardation                                                                                                    | Deciphering Developmental Disorders Study, 2015;<br>Shulman & Feany, 2003;<br>Hannan et al. 2016   |
| <i>Ank2</i>                  | cytoskeletal regulation                      | Kn                  | <i>Ank3</i> ;<br><br>autosomal recessive mental retardation                                                                                                      | Iqbal et al 2013;<br>Bi et al. 2012                                                                |

## LITERATURE CITED

- Armistead, J. and B. Triggs-Raine, 2014 Diverse diseases from a ubiquitous process: The ribosomopathy paradox. *FEBS Lett.* **588**: 1491-1500.
- Bi, C., J. Wu, T. Jiang, Q. Liu, W. Cai et al., 2012 Mutations of ANK3 identified by exome sequencing are associated with autism susceptibility. *Hum. Mutat.* **33**: 1635-1638.
- Butzlaff, M., S.B. Hannan, P. Karsten, S. Lenz, J. Ng, H. Voßfeldt et al. 2015 Impaired retrograde transport by the Dynein/Dynactin complex contributes to Tau-induced toxicity. *Hum. Mol. Genet.* **24**: 3623-3637.
- Deciphering Developmental Disorders Study, 2015 Large-scale discovery of novel genetic causes of developmental disorders. *Nature* **519**: 223-228.
- Hannan, S. B., N. M. Dräger, T. M. Rasse, A. Voigt and T. R. Jahn, 2016 Cellular and molecular modifier pathways in tauopathies: the big picture from screening invertebrate models. *J. Neurochem.* **137**: 12-25.
- Iqbal, Z., G. Vandeweyer, M. van der Voet, A. M. Waryah, M. Y. Zahoor et al., 2013 Homozygous and heterozygous disruptions of ANK3: at the crossroads of neurodevelopmental and psychiatric disorders. *Hum. Molec. Genet.* **22**: 1960-1970.
- Klauck, S. M., B. Felder, A. Kolb-Kokocinski, C. Schuster, A. Chiochetti et al., 2006 Mutations in the ribosomal protein gene RPL10 suggest a novel modulating disease mechanism for autism. *Mol. Psychiatry* **11**: 1073–1084.
- Narla, A. and B. L. Ebert, 2010 Ribosomopathies: human disorders of ribosome dysfunction. *Blood* **115**: 3196-3205.
- Parvari, R., E. HersHKovitz, N. Grossman, R. Gorodischer, B. Loeys et al., 2002 Mutation of TBCE causes hypoparathyroidism-retardation-dysmorphism and autosomal recessive Kenny-Caffey syndrome. *Nat. Genet.* **32**: 448-452.
- Shulman, J. M. and M. B. Feany, 2003 Genetic modifiers of tauopathy in *Drosophila*. *Genetics* **165**: 1233-1242.
- Tam, S., R. Geller, C. Spiess and J. Frydman, 2006 The chaperonin TRiC controls polyglutamine aggregation and toxicity through subunit-specific interactions. *Nat. Cell Biol.* **8**: 1155–1162.
- Zhou, X., W. J. Liao, J. M. Liao, P. Liao and H. Lu 2015 Ribosomal proteins: functions beyond the ribosome. *J. Mol. Cell Biol.* **7**: 92-104.
